# Supplementary material
Source: HighWire-hosted journal article supplement (https://bmjmedicine.bmj.com/content/2/1/e000392)
Supplement: inline-supplementary-material-1 [file inline-supplementary-material-1.pdf]

## PINCER Intervention

The PINCER intervention was designed to (1) identify and (2) reduce rates of potentially hazardous prescribing<sup>[1,2]</sup><sup>[1]</sup> Over the last three years, PRIMIS—a unit of the University of Nottingham providing expert advice on the intelligent use of primary care data to the NHS, academics, and industry partners—has led on the national rollout of PINCER in collaboration with the Academic Health Science Network <sup>[3]</sup>.

The PINCER intervention is comprised of three components. The first component of the intervention is a set of **prescribing safety indicators** <sup>[3]</sup>, which are used to search GP computer systems to identify patients at risk of potentially hazardous prescribing. These searches can be deployed in a number of different ways. For example they can be deployed at an individual practice level or for a group of practices at the same time (e.g. using EMIS Enterprise solution); they can be deployed by members of the practice team or (with the correct permissions in place) be deployed remotely by PRIMIS on behalf of the practice. They can also be deployed using a third party solution. Patients lists are then generated where their prescriptions potentially do not adhere to the prescribing safety guidance; aggregating these scores allows calculation of compliance against an indicator of potentially unsafe prescribing for the whole practice. Indicators belong to three groups: (1) those associated with gastrointestinal bleeds; (2) those associated with cautioned medications; and (3) those associated with blood test monitoring. It is this component of the PINCER intervention that is immediately relevant to the current study.

The remaining two components of the PINCER intervention, which ensure that improved outcomes are achieved for patients, are:

1. Pharmacists, specifically trained to deliver the intervention, providing an educational outreach intervention where they meet with GPs and other practice staff to:
  - a. Discuss the search results and highlight the importance of the hazardous prescribing identified using brief educational materials
  - b. Agree an action plan for reviewing patients identified as high risk and improving prescribing and medication monitoring systems using root cause analysis (RCA) to minimise future risk
2. Pharmacists (and pharmacy technicians) working with, and supporting, general practice staff to implement the agreed action plan.

Findings from the PINCER trial, published in the Lancet <sup>[2]</sup>, demonstrated that PINCER is an effective and cost-effective method for reducing a range of clinically important and commonly made medication errors in primary care. For example, at 6 months' follow-up, patients in the PINCER group were significantly less likely to have been prescribed an oral non-steroidal anti-inflammatory drug (NSAID) if they had a history of peptic ulcer without gastroprotection (Odds ratio (OR): 0.58; 95% Confidence Interval (CI): 0.38–0.89), thereby reducing their risk of hospital admission with gastrointestinal (GI) bleeding.

It is important to appreciate that the PINCER indicators capture rates of *potentially* hazardous prescribing: in some scenarios there may be a legitimate reason for a GP not to comply with

the prescribing behaviour suggested by the indicator (e.g., in the case of the *Asthma & beta-blocker* indicator, it may be necessary to prescribe a beta-blocker to a patient with substantial cardiovascular disease and/or allergies to other cardiovascular disease medication despite having a recorded diagnosis of asthma). In this context, full compliance is not expected for all indicators but any movement towards compliance is considered positive.

PRIMIS is able to provide a full and tailored service which includes access to a PINCER Specification and GP system searches for the PINCER indicators; IT support for the implementation of those searches within existing software solutions; a comparative analysis service that permits practices to benchmark themselves against local averages, or against themselves at an earlier point in time; and training and educational materials to enable primary care pharmacists to implement the PINCER intervention in GP practices in England. More information is available on the [PINCER website](#).

Definitions of the PINCER hazardous prescribing indicators are provided in the table below.

| Description                                                                                                                                                                      | Denominator                                                                                                                                                                                                                | Numerator (group at risk to the potentially hazardous prescribing event)                                                                                                                                                         |
|----------------------------------------------------------------------------------------------------------------------------------------------------------------------------------|----------------------------------------------------------------------------------------------------------------------------------------------------------------------------------------------------------------------------|----------------------------------------------------------------------------------------------------------------------------------------------------------------------------------------------------------------------------------|
| <b>Indicators associated with gastrointestinal bleeding</b>                                                                                                                      |                                                                                                                                                                                                                            |                                                                                                                                                                                                                                  |
| <b>Age ≥ 65 &amp; NSAID:</b> prescription of an oral non-steroidal anti-inflammatory drug (NSAID), without co-prescription of an ulcer-healing drug, to a patient aged ≥65 years | Patients aged ≥65 years without co-prescription of an ulcer-healing drug (proton pump inhibitor (PPI) or H2 antagonist) in the 3 months leading up to the audit date                                                       | Patients in the group denominator AND prescribed an oral NSAID in the 3 months leading up to the audit date                                                                                                                      |
| <b>PU &amp; NSAID:</b> prescription of an oral NSAID, without co-prescription of an ulcer healing drug, to a patient with a history of peptic ulceration                         | Patients aged ≥18 years with a Read code for peptic ulcer or GI bleed at least 3 months before audit date and not prescribed an ulcer healing drug (PPI or H2 antagonist) within the 3 months leading up to the audit date | Patients in the group denominator AND prescribed an oral NSAID within the 3 months leading up to the audit date                                                                                                                  |
| <b>PU &amp; antiplatelet:</b> prescription of an antiplatelet drug without co-prescription of an ulcer-healing drug, to a patient with a history of peptic ulceration            | Patients aged ≥18 years with a Read code for peptic ulcer or GI bleed at least 3 months before audit date and not prescribed an ulcer healing drug (PPI or H2 antagonist) within the 3 months leading up to the audit date | Patients in the group denominator AND prescribed an antiplatelet drug (aspirin or clopidogrel or prasugrel or ticagrelor) within the 3 months leading up to the audit date                                                       |
| <b>Warfarin/DOAC &amp; NSAID:</b> prescription of warfarin or DOAC in combination with an oral NSAID                                                                             | Patients aged ≥18 years prescribed warfarin or a DOAC (apixaban or dabigatran or rivaroxaban or edoxaban) within the 3 months leading up to the audit date                                                                 | Patients in the group denominator AND prescribed an oral NSAID within the 3 months leading up to the audit date                                                                                                                  |
| <b>Warfarin/DOAC &amp; antiplatelet:</b> prescription of warfarin or DOAC and an antiplatelet drug in combination without coprescription of an ulcer-healing drug                | Patients aged ≥18 years prescribed warfarin or DOAC without co-prescription of ulcer-healing drug (PPI or H2 antagonist) within the 3 months leading up to the audit date                                                  | Patients in the group denominator AND prescribed an antiplatelet drug (aspirin or clopidogrel or prasugrel or ticagrelor) within the 3 months leading up to the audit date and within 28 days of the warfarin/ DOAC prescription |
| <b>Aspirin &amp; other antiplatelet:</b> prescription of aspirin in combination with another antiplatelet drug (without coprescription of an ulcer-healing drug)                 | Patients aged ≥18 years prescribed aspirin without coprescription of ulcer-healing drug (PPI or H2 antagonist) within the 3 months leading up to the audit date                                                            | Patients in the group denominator AND prescribed another antiplatelet drug (clopidogrel or prasugrel or ticagrelor) within the 3 months leading up to the audit date and within 28 days of the aspirin prescription              |
| <b>Indicators associated with cautioned medication in other conditions (including heart failure, asthma and acute kidney injury)</b>                                             |                                                                                                                                                                                                                            |                                                                                                                                                                                                                                  |
| <b>HF &amp; NSAID:</b> prescription of an                                                                                                                                        | Patients aged ≥18 years who have a                                                                                                                                                                                         | Patients in the group denominator AND prescribed an oral NSAID                                                                                                                                                                   |

|                                                                                                                                                                                                                                                                                                                                |                                                                                                                                                                                                                                                                                            |                                                                                                                                                                                                                                                      |
|--------------------------------------------------------------------------------------------------------------------------------------------------------------------------------------------------------------------------------------------------------------------------------------------------------------------------------|--------------------------------------------------------------------------------------------------------------------------------------------------------------------------------------------------------------------------------------------------------------------------------------------|------------------------------------------------------------------------------------------------------------------------------------------------------------------------------------------------------------------------------------------------------|
| oral NSAID to a patient with heart failure                                                                                                                                                                                                                                                                                     | diagnosis of heart failure at least 3 months before the audit date                                                                                                                                                                                                                         | within the 3 months leading up to the audit date                                                                                                                                                                                                     |
| <b>Asthma &amp; beta-blocker:</b><br>prescription of a non-selective beta-blocker to a patient with asthma                                                                                                                                                                                                                     | Patients aged ≥18 years with a Read code for asthma at least 3 months before audit date and no subsequent asthma resolved code during that time period                                                                                                                                     | Patients in the group denominator AND prescribed a non-selective β-blocker within the 3 months leading up to the audit date                                                                                                                          |
| <b>CRF &amp; NSAID:</b> prescription of an oral NSAID to a patient with eGFR <45                                                                                                                                                                                                                                               | Patients aged ≥18 years with chronic renal failure: eGFR <45 at least 3 months before the audit date                                                                                                                                                                                       | Patients in the group denominator AND prescribed an oral NSAID within the 3 months leading up to the audit date                                                                                                                                      |
| <b>Indicators associated blood test monitoring</b>                                                                                                                                                                                                                                                                             |                                                                                                                                                                                                                                                                                            |                                                                                                                                                                                                                                                      |
| <b>ACEI or loop diuretic, no blood tests:</b> patients aged 75 years and older who have been prescribed an angiotensin converting enzyme (ACE) inhibitor or a loop diuretic long term who have not had a computer-recorded check of their renal function and electrolytes in the previous 15 months                            | Patients aged ≥75 years prescribed an ACE inhibitor or a loop diuretic long-term i.e. first prescription for an ACE inhibitor or a loop diuretic at least 15 months prior to the audit date and at least one prescription (for the same drug) in the 6 months leading up to the audit date | Patients in the group denominator AND who have not had a computer-recorded check of their renal function and electrolytes within the previous 15 months leading up to the audit date                                                                 |
| Patients receiving methotrexate for at least 3 months who have not had a recorded: <ul style="list-style-type: none"> <li>• Full blood count (FBC) within the previous 3 months (<b>Methotrexate and no FBC</b>)</li> <li>• Liver function test (LFT) within the previous 3 months (<b>Methotrexate and no LFT</b>)</li> </ul> | Patients aged ≥18 years with one or more prescriptions for methotrexate 3 to 6 months prior to the audit date and in the 3 months leading up to the audit date                                                                                                                             | Patients in the group denominator AND who have not had a computer-recorded: <ul style="list-style-type: none"> <li>• FBC within the 3 months leading up to the audit date</li> <li>• LFT within the 3 months leading up to the audit date</li> </ul> |
| <b>Lithium and no level recording:</b> patients receiving lithium for at least 3 months who have not had a recorded check of their lithium concentrations in the previous 3 months                                                                                                                                             | Patients aged ≥18 years with one or more prescriptions for lithium recorded on computer 3 to 6 months prior to the audit date and in the 3 months leading up to the audit date                                                                                                             | Patients in the group denominator AND who have not had a computer-recorded lithium level within the 3 months leading up to the audit date                                                                                                            |
| <b>Amiodarone and no TFT:</b> patients receiving amiodarone for at least 6 months who have not had a thyroid function test (TFT) within the previous 6 months                                                                                                                                                                  | Patients aged ≥18 years with one or more prescriptions for amiodarone 6 to 12 months prior to the audit date and in the 6 months leading up to the audit date                                                                                                                              | Patients in the group denominator AND who have not had a computer-recorded TFT within the 6 months leading up to the audit date                                                                                                                      |

1. Avery AJ, Rodgers S, Cantrill JA, Armstrong S, Elliott R, Howard R, et al. Protocol for the PINCER trial: a cluster randomised trial comparing the effectiveness of a pharmacist-led IT-based intervention with simple feedback in reducing rates of clinically important errors in medicines management in general practices. *Trials*. 2009;10: 28.
2. Avery AJ, Rodgers S, Cantrill JA, Armstrong S, Cresswell K, Eden M, et al. A pharmacist-led information technology intervention for medication errors (PINCER): a multicentre, cluster randomised, controlled trial and cost-effectiveness analysis. *Lancet*. 2012;379: 1310–1319.
3. PRIMIS Team. PINCER National Rollout: Progress Report to NHS England and the AHSN Network. University of Nottingham; 2020 Jul. Available: <https://www.nottingham.ac.uk/primis/documents/pincer/pincer-progress-report-july-2020.pdf>

## Supplementary Figures

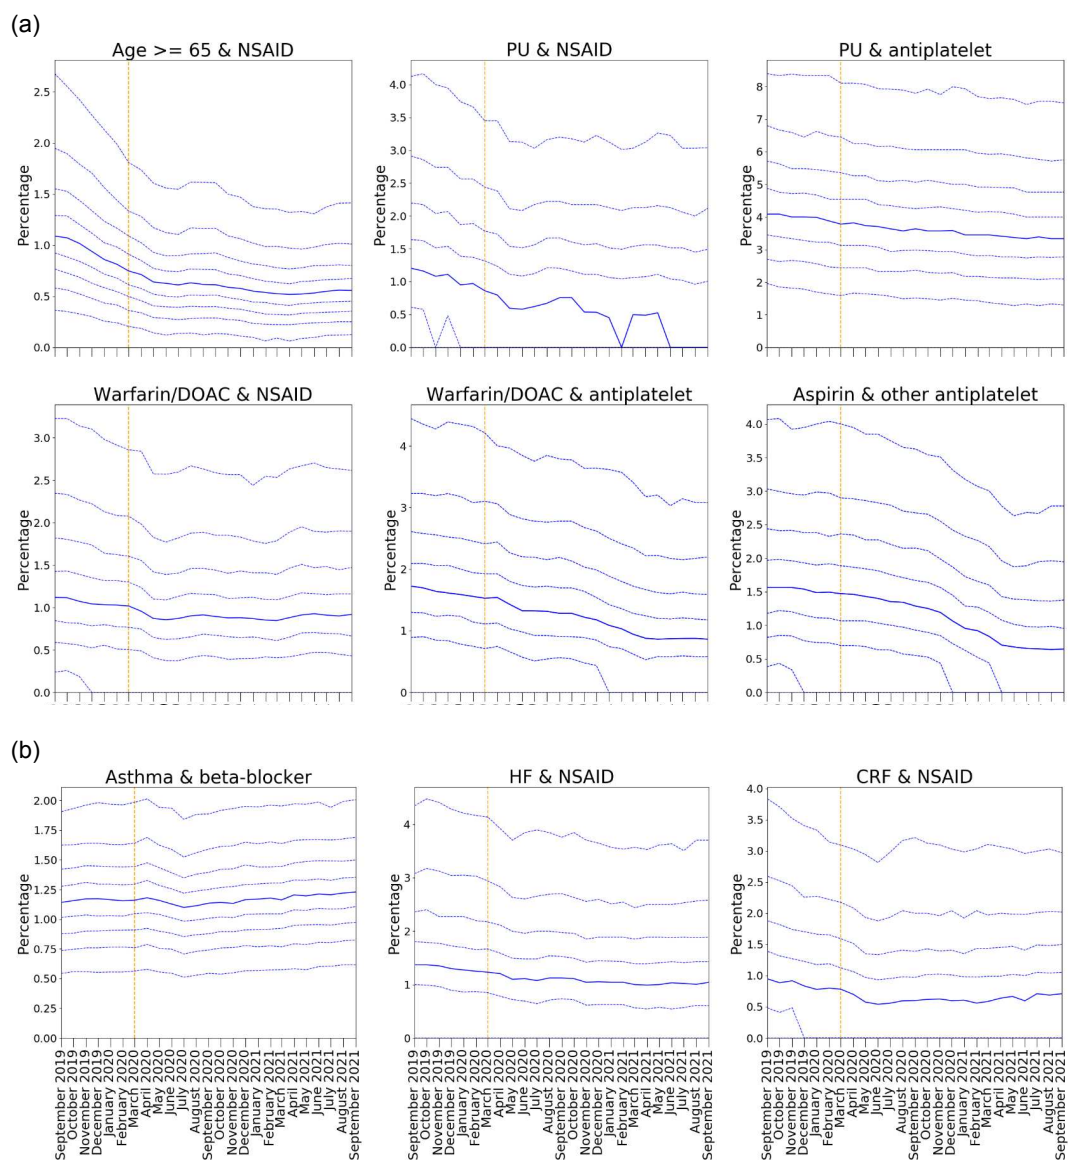

**Supplementary Figure 1 - OpenSAFELY-TPP practice level decile plots for PINCER prescribing indicators, specifically in relation to (a) GI bleeding and (b) cautioned medications.** All deciles are calculated across 2546 OpenSAFELY-TPP practices. The percentage of patients identified as at risk of potentially hazardous prescribing as measured by each indicator is reported for the period September 2019 to September 2021 (inclusive). The median percentage is displayed as a thick blue line and deciles are indicated by dashed blue lines. The month of national lockdown in England as a response to the onset of COVID-19 (March 2020) is highlighted with an orange dashed vertical line.

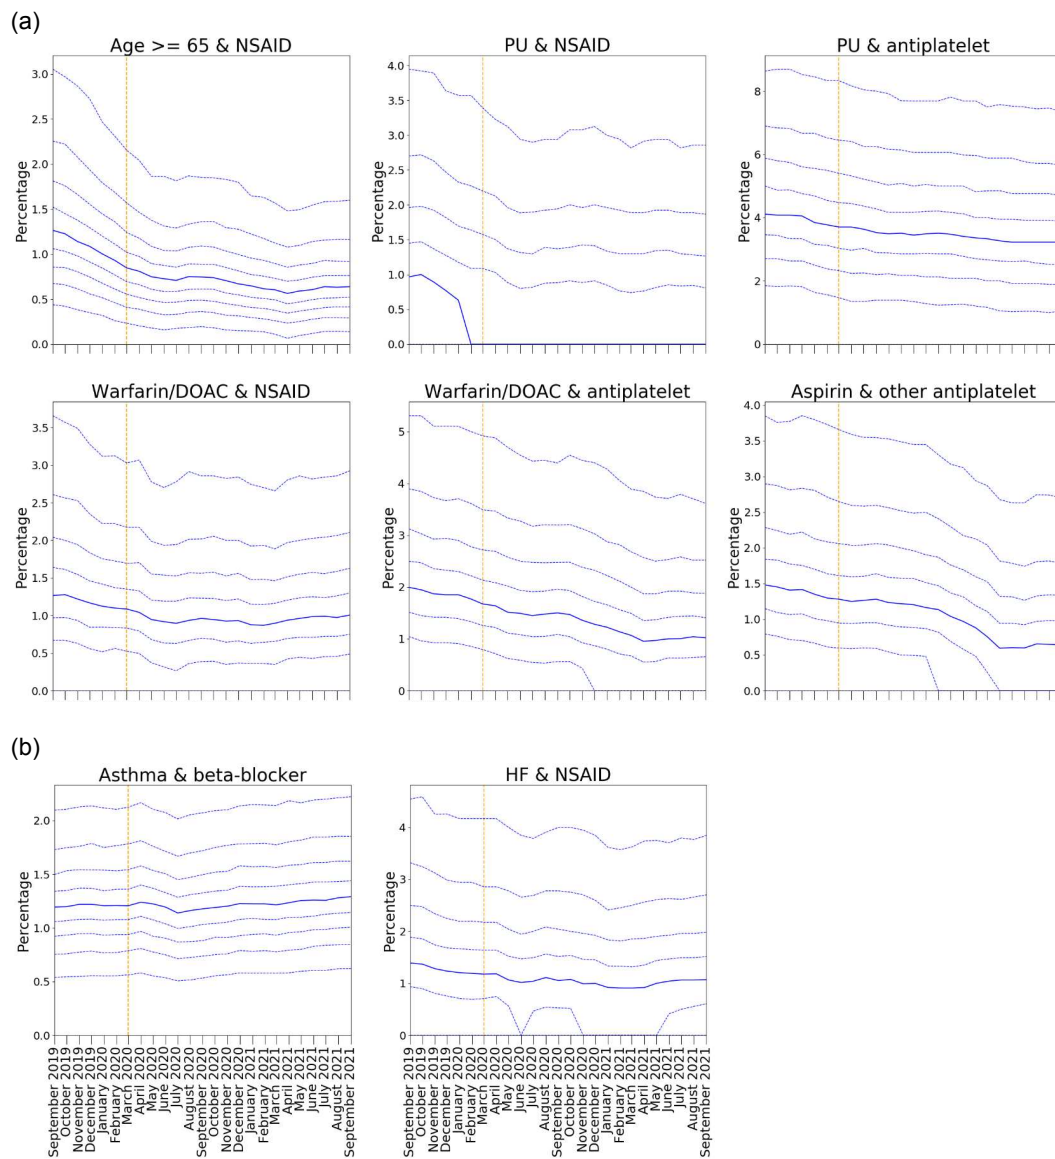

**Supplementary Figure 2 - OpenSAFELY-EMIS practice level decile plots for PINCER prescribing indicators, specifically in relation to (a) GI bleeding and (b) cautioned medications.** All deciles are calculated across 3821 OpenSAFELY-EMIS practices. The percentage of patients identified as at risk of potentially hazardous prescribing as measured by each indicator is reported for the period September 2019 to September 2021 (inclusive). The median percentage is reported for the period September 2019 to September 2021 (inclusive). The median percentage is displayed as a thick blue line and deciles are indicated by dashed blue lines. The month of national lockdown in England as a response to the onset of COVID-19 (March 2020) is highlighted with an orange dashed vertical line. Note that the CRF & NSAID indicator could not be implemented in OpenSAFELY-EMIS and therefore not shown.

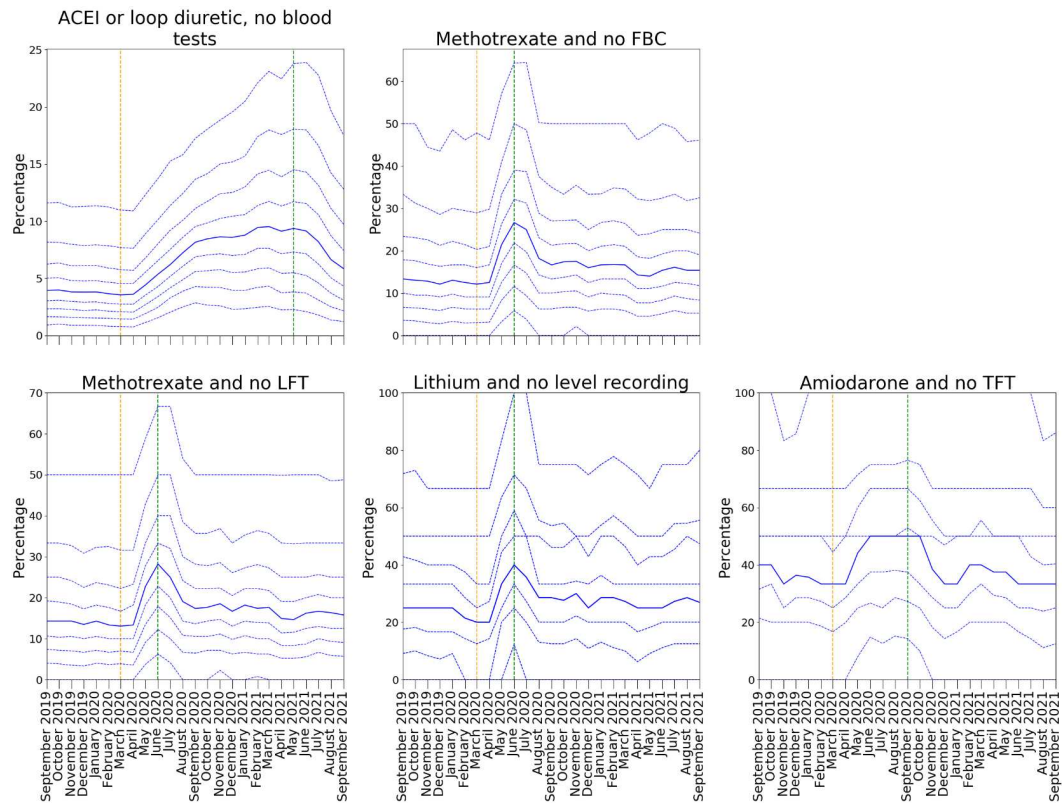

**Supplementary Figure 3 - OpenSAFELY-TPP practice level decile plots for Pincer blood test monitoring indicators.** All deciles are calculated across 2546 OpenSAFELY-TPP practices. The percentage of patients identified as at risk of potentially blood test monitoring as measured by each indicator is reported for the period September 2019 to September 2021 (inclusive). The median percentage is displayed as a thick blue line and deciles are indicated by dashed blue lines. The month of national lockdown in England as a response to the onset of COVID-19 (March 2020) is highlighted with an orange dashed vertical line. The monitoring window, as measured from the onset of COVID-19, for each indicator is shown by a green dashed vertical line.

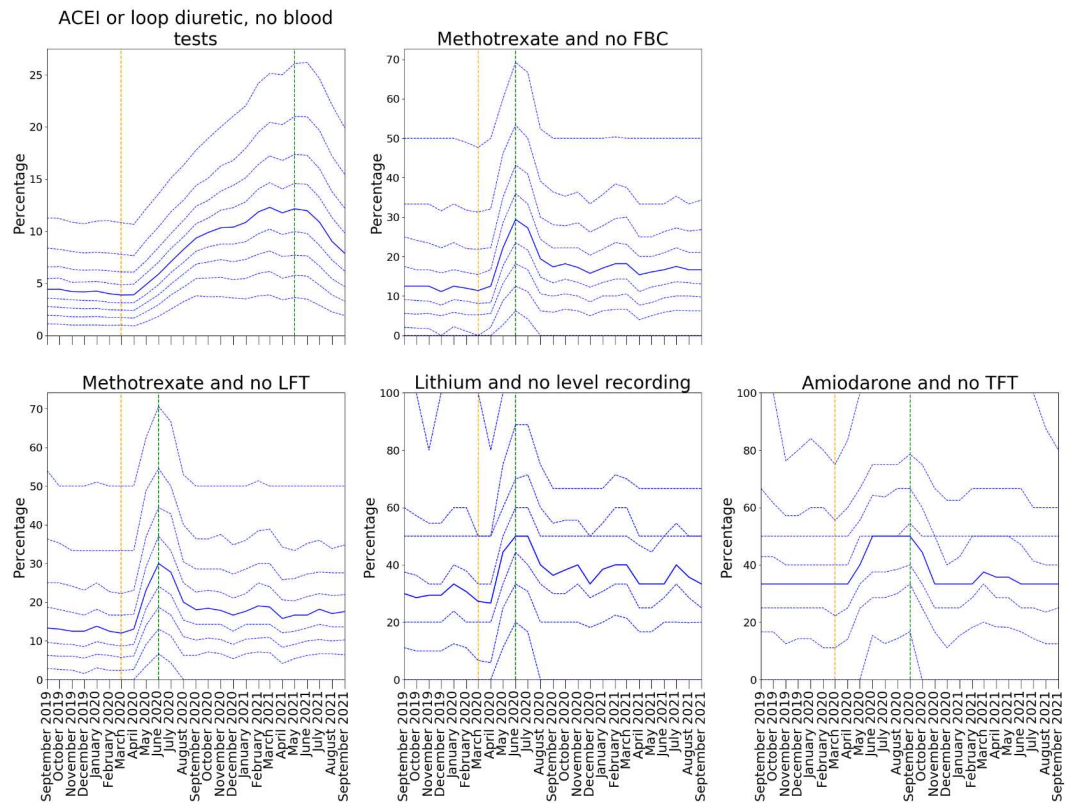

**Supplementary Figure 4 - OpenSAFELY-EMIS practice level decile plots for Pincer blood test monitoring indicators.** All deciles are calculated across 3821 OpenSAFELY-EMIS practices. The percentage of patients identified as at risk of potentially blood test monitoring as measured by each indicator is reported for the period September 2019 to September 2021 (inclusive). The median percentage is displayed as a thick blue line and deciles are indicated by dashed blue lines. The month of national lockdown in England as a response to the onset of COVID-19 (March 2020) is highlighted with an orange dashed vertical line. The monitoring window, as measured from the onset of COVID-19, for each indicator is shown by a green dashed vertical line.

| Supplementary Table 1                                                                                                                                                            |                           | Indicator rates for PINCER hazardous prescribing indicators (in 2546 OpenSAFELY-TPP practices only): Q1 2020/2021 percentages and cumulative results between September 2019 and September 2021. Mean values calculated at the practice-level. |                                          |           |             |      |                |                                        |                             |                                                                   |                                |                                                                                                    |
|----------------------------------------------------------------------------------------------------------------------------------------------------------------------------------|---------------------------|-----------------------------------------------------------------------------------------------------------------------------------------------------------------------------------------------------------------------------------------------|------------------------------------------|-----------|-------------|------|----------------|----------------------------------------|-----------------------------|-------------------------------------------------------------------|--------------------------------|----------------------------------------------------------------------------------------------------|
| OpenSafely                                                                                                                                                                       |                           |                                                                                                                                                                                                                                               |                                          |           |             |      |                |                                        |                             |                                                                   |                                |                                                                                                    |
| Point in time                                                                                                                                                                    |                           |                                                                                                                                                                                                                                               | Cumulative results (Sept 2019-Sept 2021) |           |             |      |                |                                        |                             |                                                                   |                                |                                                                                                    |
| Indicator                                                                                                                                                                        | Q1 median proportion 2020 | Q1 median proportion 2021                                                                                                                                                                                                                     | Q1 2021 - Q1 2020                        | Numerator | Denominator | %    | Numerator (%)  | Number of hazardous prescribing events | Ratio of events to patients | Number of practices with at least one hazardous prescribing event | % of total number of practices | Number of practices with at least one hazardous prescribing event (% of total number of practices) |
| <b>Indicators associated with gastroi</b>                                                                                                                                        | -                         | -                                                                                                                                                                                                                                             | -                                        | 235912    | 4743819     | 4.97 | 235912 (4.97%) | -                                      | -                           | 2538                                                              | -                              | -                                                                                                  |
| <b>Age ≥ 65 &amp; NSAID:</b> prescription of an oral non-steroidal anti-inflammatory drug (NSAID), without co-prescription of an ulcer-healing drug, to a patient aged ≥65 years | 1.02                      | 0.67                                                                                                                                                                                                                                          | -0.35                                    | 142278    | 4030402     | 3.53 | 142278 (3.53%) | 633881                                 | 4.46                        | 2524                                                              | 99.14                          | 2524 (99.14%)                                                                                      |
| <b>PU &amp; NSAID:</b> prescription of an oral NSAID, without co-prescription of an ulcer healing drug, to a patient with a history of peptic ulceration                         | 1.41                      | 1.14                                                                                                                                                                                                                                          | -0.27                                    | 14993     | 283554      | 5.29 | 14993 (5.29%)  | 57124                                  | 3.81                        | 2369                                                              | 93.05                          | 2369 (93.05%)                                                                                      |
| <b>PU &amp; antiplatelet:</b> prescription of an antiplatelet drug without co-prescription of an ulcer-healing drug, to a patient with a history of peptic ulceration            | 4.26                      | 3.9                                                                                                                                                                                                                                           | -0.36                                    | 17511     | 283554      | 6.18 | 17511 (6.18%)  | 193083                                 | 11.03                       | 2382                                                              | 93.56                          | 2382 (93.56%)                                                                                      |
| <b>Warfarin/DOAC &amp; NSAID:</b> prescription of warfarin or DOAC in combination with an oral NSAID                                                                             | 1.36                      | 1.16                                                                                                                                                                                                                                          | -0.20                                    | 36318     | 844996      | 4.3  | 36318 (4.3%)   | 163730                                 | 4.51                        | 2499                                                              | 98.15                          | 2499 (98.15%)                                                                                      |
| <b>Warfarin/DOAC &amp; antiplatelet:</b> prescription of warfarin or DOAC and an antiplatelet drug in combination without coprescription of an ulcer-healing drug                | 2                         | 1.45                                                                                                                                                                                                                                          | -0.55                                    | 21414     | 552859      | 3.87 | 21414 (3.87%)  | 128221                                 | 5.99                        | 2430                                                              | 95.44                          | 2430 (95.44%)                                                                                      |
| <b>Aspirin &amp; other antiplatelet:</b> prescription of aspirin in combination with another antiplatelet drug (without coprescription of an ulcer-healing drug)                 | 1.83                      | 1.29                                                                                                                                                                                                                                          | -0.54                                    | 16206     | 628228      | 2.58 | 16206 (2.58%)  | 116318                                 | 7.18                        | 2280                                                              | 89.55                          | 2280 (89.55%)                                                                                      |



| Supplementary Table 1                                                                                                                                                                                                                                                                               |                           |                           |                   |           |             |       |                 |                                        |                             |                                                                   |                                |                                                                                                    |
|-----------------------------------------------------------------------------------------------------------------------------------------------------------------------------------------------------------------------------------------------------------------------------------------------------|---------------------------|---------------------------|-------------------|-----------|-------------|-------|-----------------|----------------------------------------|-----------------------------|-------------------------------------------------------------------|--------------------------------|----------------------------------------------------------------------------------------------------|
| Indicator rates for PINCER hazardous prescribing indicators (in 2546 OpenSAFELY-TPP practices only): Q1 2020/2021 percentages and cumulative results between September 2019 and September 2021. Mean values calculated at the practice-level.                                                       |                           |                           |                   |           |             |       |                 |                                        |                             |                                                                   |                                |                                                                                                    |
| OpenSafely                                                                                                                                                                                                                                                                                          |                           |                           |                   |           |             |       |                 |                                        |                             |                                                                   |                                |                                                                                                    |
| Point in time                                                                                                                                                                                                                                                                                       |                           |                           |                   |           |             |       |                 |                                        |                             |                                                                   |                                |                                                                                                    |
| Cumulative results (Sept 2019-Sept 2021)                                                                                                                                                                                                                                                            |                           |                           |                   |           |             |       |                 |                                        |                             |                                                                   |                                |                                                                                                    |
| Indicator                                                                                                                                                                                                                                                                                           | Q1 median proportion 2020 | Q1 median proportion 2021 | Q1 2021 - Q1 2020 | Numerator | Denominator | %     | Numerator (%)   | Number of hazardous prescribing events | Ratio of events to patients | Number of practices with at least one hazardous prescribing event | % of total number of practices | Number of practices with at least one hazardous prescribing event (% of total number of practices) |
| <b>Indicators associated with gastroi</b>                                                                                                                                                                                                                                                           | -                         | -                         | -                 | 235912    | 4743819     | 4.97  | 235912 (4.97%)  | -                                      | -                           | 2538                                                              | -                              | -                                                                                                  |
| <b>Indicators associated with cautioned medication in other conditions (including heart failure, asthma and acute kidney injury)</b>                                                                                                                                                                | -                         | -                         | -                 | 101633    | 3338331     | 3.04  | 101633 (3.04%)  | -                                      | -                           | 2532                                                              | -                              | -                                                                                                  |
| <b>Asthma &amp; beta-blocker:</b> prescription of a non-selective beta-blocker to a patient with asthma                                                                                                                                                                                             | 1.23                      | 1.25                      | 0.02              | 75833     | 2744049     | 2.76  | 75833 (2.76%)   | 772431                                 | 10.19                       | 2525                                                              | 99.18                          | 2525 (99.18%)                                                                                      |
| <b>HF &amp; NSAID:</b> prescription of an oral NSAID to a patient with heart failure                                                                                                                                                                                                                | 1.75                      | 1.44                      | -0.31             | 13378     | 317170      | 4.22  | 13378 (4.22%)   | 83559                                  | 6.25                        | 2272                                                              | 89.24                          | 2272 (89.24%)                                                                                      |
| <b>CRF &amp; NSAID:</b> prescription of an oral NSAID to a patient with eGFR <45                                                                                                                                                                                                                    | 1.27                      | 1.12                      | -0.15             | 14558     | 476925      | 3.05  | 14558 (3.05%)   | 68384                                  | 4.7                         | 2217                                                              | 87.08                          | 2217 (87.08%)                                                                                      |
| <b>Indicators associated blood test monitoring</b>                                                                                                                                                                                                                                                  | -                         | -                         | -                 | 466522    | 1477986     | 31.56 | 466522 (31.56%) | -                                      | -                           | 2531                                                              | -                              | -                                                                                                  |
| <b>ACEI or loop diuretic, no blood tests:</b> patients aged 75 years and older who have been prescribed an angiotensin converting enzyme (ACE) inhibitor or a loop diuretic long term who have not had a computer-recorded check of their renal function and electrolytes in the previous 15 months | 5.08                      | 11                        | 5.92              | 356896    | 1363003     | 26.18 | 356896 (26.18%) | 2070891                                | 5.8                         | 2521                                                              | 99.02                          | 2521 (99.02%)                                                                                      |
| <b>Methotrexate and no FBC:</b> patients receiving methotrexate for at least 3 months who have not had a recorded full blood count (FBC) within the previous 3 months                                                                                                                               | 18.52                     | 22.11                     | 3.59              | 72265     | 104241      | 69.32 | 72265 (69.32%)  | 371960                                 | 5.15                        | 2511                                                              | 98.63                          | 2511 (98.63%)                                                                                      |

| Supplementary Table 1                                                                                                                                                              |                           | Indicator rates for PINCER hazardous prescribing indicators (in 2546 OpenSAFELY-TPP practices only): Q1 2020/2021 percentages and cumulative results between September 2019 and September 2021. Mean values calculated at the practice-level. |                   |                                          |             |       |                |                                        |                             |                                                                   |                                |                                                                                                    |  |
|------------------------------------------------------------------------------------------------------------------------------------------------------------------------------------|---------------------------|-----------------------------------------------------------------------------------------------------------------------------------------------------------------------------------------------------------------------------------------------|-------------------|------------------------------------------|-------------|-------|----------------|----------------------------------------|-----------------------------|-------------------------------------------------------------------|--------------------------------|----------------------------------------------------------------------------------------------------|--|
| OpenSafely                                                                                                                                                                         |                           |                                                                                                                                                                                                                                               |                   |                                          |             |       |                |                                        |                             |                                                                   |                                |                                                                                                    |  |
| Point in time                                                                                                                                                                      |                           |                                                                                                                                                                                                                                               |                   | Cumulative results (Sept 2019-Sept 2021) |             |       |                |                                        |                             |                                                                   |                                |                                                                                                    |  |
| Indicator                                                                                                                                                                          | Q1 median proportion 2020 | Q1 median proportion 2021                                                                                                                                                                                                                     | Q1 2021 - Q1 2020 | Numerator                                | Denominator | %     | Numerator (%)  | Number of hazardous prescribing events | Ratio of events to patients | Number of practices with at least one hazardous prescribing event | % of total number of practices | Number of practices with at least one hazardous prescribing event (% of total number of practices) |  |
| <b>Indicators associated with gastroi</b>                                                                                                                                          | -                         | -                                                                                                                                                                                                                                             | -                 | 235912                                   | 4743819     | 4.97  | 235912 (4.97%) | -                                      | -                           | 2538                                                              | -                              | -                                                                                                  |  |
| <b>Methotrexate and no LFT:</b> patients receiving methotrexate for at least 3 months who have not had a recorded liver function test (LFT) within the previous 3 months           | 19.73                     | 22.78                                                                                                                                                                                                                                         | 3.05              | 73305                                    | 104241      | 70.32 | 73305 (70.32%) | 385483                                 | 5.26                        | 2511                                                              | 98.63                          | 2511 (98.63%)                                                                                      |  |
| <b>Lithium and no level recording:</b> patients receiving lithium for at least 3 months who have not had a recorded check of their lithium concentrations in the previous 3 months | 27.47                     | 32.88                                                                                                                                                                                                                                         | 5.41              | 18118                                    | 20626       | 87.84 | 18118 (87.84%) | 114354                                 | 6.31                        | 2422                                                              | 95.13                          | 2422 (95.13%)                                                                                      |  |
| <b>Amiodarone and no TFT:</b> patients receiving amiodarone for at least 6 months who have not had a thyroid function test (TFT) within the previous 6 months                      | 38.47                     | 40.32                                                                                                                                                                                                                                         | 1.85              | 19019                                    | 24524       | 77.55 | 19019 (77.55%) | 122358                                 | 6.43                        | 2406                                                              | 94.5                           | 2406 (94.5%)                                                                                       |  |

| Supplementary Table 2                                                                                                                                                            |                           | Indicator rates for PINCER hazardous prescribing indicators (in 3821 OpenSAFELY-EMIS practices only): Q1 2020/2021 percentages and cumulative results between September 2019 and September 2021. Mean values calculated at the practice-level. No results provided for CRF & NSAID as this indicator could not be implemented in OpenSAFELY-EMIS. |                   |           |             |      |                |                                        |                             |                                                                   |                                |                                                                                                    |  |  |
|----------------------------------------------------------------------------------------------------------------------------------------------------------------------------------|---------------------------|---------------------------------------------------------------------------------------------------------------------------------------------------------------------------------------------------------------------------------------------------------------------------------------------------------------------------------------------------|-------------------|-----------|-------------|------|----------------|----------------------------------------|-----------------------------|-------------------------------------------------------------------|--------------------------------|----------------------------------------------------------------------------------------------------|--|--|
| OpenSAFELY                                                                                                                                                                       |                           |                                                                                                                                                                                                                                                                                                                                                   |                   |           |             |      |                |                                        |                             |                                                                   |                                |                                                                                                    |  |  |
| Point in time                                                                                                                                                                    |                           |                                                                                                                                                                                                                                                                                                                                                   |                   |           |             |      |                |                                        |                             |                                                                   |                                |                                                                                                    |  |  |
| Cumulative results (Sept 2019-Sept 2021)                                                                                                                                         |                           |                                                                                                                                                                                                                                                                                                                                                   |                   |           |             |      |                |                                        |                             |                                                                   |                                |                                                                                                    |  |  |
| Indicator                                                                                                                                                                        | Q1 median proportion 2020 | Q1 median proportion 2021                                                                                                                                                                                                                                                                                                                         | Q1 2021 - Q1 2020 | Numerator | Denominator | %    | Numerator (%)  | Number of hazardous prescribing events | Ratio of events to patients | Number of practices with at least one hazardous prescribing event | % of total number of practices | Number of practices with at least one hazardous prescribing event (% of total number of practices) |  |  |
| <b>Indicators associated with gastrointest</b>                                                                                                                                   | -                         | -                                                                                                                                                                                                                                                                                                                                                 | -                 | 315932    | 6137856     | 5.15 | 315932 (5.15%) | -                                      | -                           | 3797                                                              | -                              | -                                                                                                  |  |  |
| <b>Age ≥ 65 &amp; NSAID:</b> prescription of an oral non-steroidal anti-inflammatory drug (NSAID), without co-prescription of an ulcer-healing drug, to a patient aged ≥65 years | 1.16                      | 0.79                                                                                                                                                                                                                                                                                                                                              | -0.37             | 192209    | 5176605     | 3.71 | 192209 (3.71%) | 885005                                 | 4.6                         | 3780                                                              | 98.93                          | 3780 (98.93%)                                                                                      |  |  |
| <b>PU &amp; NSAID:</b> prescription of an oral NSAID, without co-prescription of an ulcer healing drug, to a patient with a history of peptic ulceration                         | 1.25                      | 1.01                                                                                                                                                                                                                                                                                                                                              | -0.24             | 17096     | 394664      | 4.33 | 17096 (4.33%)  | 65853                                  | 3.85                        | 3432                                                              | 89.82                          | 3432 (89.82%)                                                                                      |  |  |
| <b>PU &amp; antiplatelet:</b> prescription of an antiplatelet drug without co-prescription of an ulcer-healing drug, to a patient with a history of peptic ulceration            | 4.23                      | 3.81                                                                                                                                                                                                                                                                                                                                              | -0.42             | 23903     | 394664      | 6.06 | 23903 (6.06%)  | 258187                                 | 10.8                        | 3561                                                              | 93.2                           | 3561 (93.2%)                                                                                       |  |  |
| <b>Warfarin/DOAC &amp; NSAID:</b> prescription of warfarin or DOAC in combination with an oral NSAID                                                                             | 1.41                      | 1.19                                                                                                                                                                                                                                                                                                                                              | -0.22             | 47783     | 1070121     | 4.47 | 47783 (4.47%)  | 220850                                 | 4.62                        | 3694                                                              | 96.68                          | 3694 (96.68%)                                                                                      |  |  |
| <b>Warfarin/DOAC &amp; antiplatelet:</b> prescription of warfarin or DOAC and an antiplatelet drug in combination without coprescription of an ulcer-healing drug                | 2.26                      | 1.67                                                                                                                                                                                                                                                                                                                                              | -0.59             | 31161     | 697006      | 4.47 | 31161 (4.47%)  | 179827                                 | 5.77                        | 3638                                                              | 95.21                          | 3638 (95.21%)                                                                                      |  |  |
| <b>Aspirin &amp; other antiplatelet:</b> prescription of aspirin in combination with another antiplatelet drug (without coprescription of an ulcer-healing drug)                 | 1.67                      | 1.2                                                                                                                                                                                                                                                                                                                                               | -0.47             | 20721     | 842087      | 2.46 | 20721 (2.46%)  | 147539                                 | 7.12                        | 3497                                                              | 91.52                          | 3497 (91.52%)                                                                                      |  |  |
| <b>Indicators associated with cautioned medication in other conditions (including heart failure, asthma and acute kidney injury)</b>                                             | -                         | -                                                                                                                                                                                                                                                                                                                                                 | -                 | 126954    | 4256356     | 2.98 | 126954 (2.98%) | -                                      | -                           | 3789                                                              | -                              | -                                                                                                  |  |  |

| Supplementary Table 2                                                                                                                                                                                                                                                                               |                           | Indicator rates for PINCER hazardous prescribing indicators (in 3821 OpenSAFELY-EMIS practices only): Q1 2020/2021 percentages and cumulative results between September 2019 and September 2021. Mean values calculated at the practice-level. No results provided for CRF & NSAID as this indicator could not be implemented in OpenSAFELY-EMIS. |                   |                                          |             |       |                 |                                        |                             |                                                                   |                                |                                                                                                    |   |
|-----------------------------------------------------------------------------------------------------------------------------------------------------------------------------------------------------------------------------------------------------------------------------------------------------|---------------------------|---------------------------------------------------------------------------------------------------------------------------------------------------------------------------------------------------------------------------------------------------------------------------------------------------------------------------------------------------|-------------------|------------------------------------------|-------------|-------|-----------------|----------------------------------------|-----------------------------|-------------------------------------------------------------------|--------------------------------|----------------------------------------------------------------------------------------------------|---|
| OpenSafely                                                                                                                                                                                                                                                                                          |                           |                                                                                                                                                                                                                                                                                                                                                   |                   |                                          |             |       |                 |                                        |                             |                                                                   |                                |                                                                                                    |   |
| Point in time                                                                                                                                                                                                                                                                                       |                           |                                                                                                                                                                                                                                                                                                                                                   |                   | Cumulative results (Sept 2019-Sept 2021) |             |       |                 |                                        |                             |                                                                   |                                |                                                                                                    |   |
| Indicator                                                                                                                                                                                                                                                                                           | Q1 median proportion 2020 | Q1 median proportion 2021                                                                                                                                                                                                                                                                                                                         | Q1 2021 - Q1 2020 | Numerator                                | Denominator | %     | Numerator (%)   | Number of hazardous prescribing events | Ratio of events to patients | Number of practices with at least one hazardous prescribing event | % of total number of practices | Number of practices with at least one hazardous prescribing event (% of total number of practices) |   |
| <b>Indicators associated with gastroi</b>                                                                                                                                                                                                                                                           | -                         | -                                                                                                                                                                                                                                                                                                                                                 | -                 | 315932                                   | 6137856     | 5.15  | 315932 (5.15%)  | -                                      | -                           | 3797                                                              | -                              | -                                                                                                  | - |
| <b>Asthma &amp; beta-blocker:</b><br>prescription of a non-selective beta-blocker to a patient with asthma                                                                                                                                                                                          | 1.3                       | 1.32                                                                                                                                                                                                                                                                                                                                              | 0.02              | 109456                                   | 3902537     | 2.8   | 109456 (2.8%)   | 1125619                                | 10.28                       | 3782                                                              | 98.98                          | 3782 (98.98%)                                                                                      |   |
| <b>HF &amp; NSAID:</b> prescription of an oral NSAID to a patient with heart failure                                                                                                                                                                                                                | 1.68                      | 1.43                                                                                                                                                                                                                                                                                                                                              | -0.25             | 17656                                    | 418611      | 4.22  | 17656 (4.22%)   | 105402                                 | 5.97                        | 3350                                                              | 87.67                          | 3350 (87.67%)                                                                                      |   |
| <b>CRF &amp; NSAID:</b> prescription of an oral NSAID to a patient with eGFR <45                                                                                                                                                                                                                    | -                         | -                                                                                                                                                                                                                                                                                                                                                 | -                 | -                                        | -           | -     | - (-%)          | -                                      | -                           | -                                                                 | -                              | -                                                                                                  | - |
| <b>Indicators associated blood test monitoring</b>                                                                                                                                                                                                                                                  | -                         | -                                                                                                                                                                                                                                                                                                                                                 | -                 | 635687                                   | 1880968     | 33.8  | 635687 (33.8%)  | -                                      | -                           | 3798                                                              | -                              | -                                                                                                  | - |
| <b>ACEI or loop diuretic, no blood tests:</b> patients aged 75 years and older who have been prescribed an angiotensin converting enzyme (ACE) inhibitor or a loop diuretic long term who have not had a computer-recorded check of their renal function and electrolytes in the previous 15 months | 5.2                       | 12.9                                                                                                                                                                                                                                                                                                                                              | 7.7               | 493691                                   | 1732592     | 28.49 | 493691 (28.49%) | 2935654                                | 5.95                        | 3782                                                              | 98.98                          | 3782 (98.98%)                                                                                      |   |
| <b>Methotrexate and no FBC:</b> patients receiving methotrexate for at least 3 months who have not had a recorded full blood count (FBC) within the previous 3 months                                                                                                                               | 18.73                     | 23.15                                                                                                                                                                                                                                                                                                                                             | 4.42              | 92237                                    | 133801      | 68.94 | 92237 (68.94%)  | 459580                                 | 4.98                        | 3767                                                              | 98.59                          | 3767 (98.59%)                                                                                      |   |
| <b>Methotrexate and no LFT:</b> patients receiving methotrexate for at least 3 months who have not had a recorded liver function test (LFT) within the previous 3 months                                                                                                                            | 19.54                     | 23.6                                                                                                                                                                                                                                                                                                                                              | 4.06              | 93179                                    | 133801      | 69.64 | 93179 (69.64%)  | 470010                                 | 5.04                        | 3767                                                              | 98.59                          | 3767 (98.59%)                                                                                      |   |

| Supplementary Table 2                                                                                                                                                              |                           | Indicator rates for PINCER hazardous prescribing indicators (in 3821 OpenSAFELY-EMIS practices only): Q1 2020/2021 percentages and cumulative results between September 2019 and September 2021. Mean values calculated at the practice-level. No results provided for CRF & NSAID as this indicator could not be implemented in OpenSAFELY-EMIS. |                                          |           |             |       |                |                                        |                             |                                                                   |                                |                                                                                                    |
|------------------------------------------------------------------------------------------------------------------------------------------------------------------------------------|---------------------------|---------------------------------------------------------------------------------------------------------------------------------------------------------------------------------------------------------------------------------------------------------------------------------------------------------------------------------------------------|------------------------------------------|-----------|-------------|-------|----------------|----------------------------------------|-----------------------------|-------------------------------------------------------------------|--------------------------------|----------------------------------------------------------------------------------------------------|
| OpenSafely                                                                                                                                                                         |                           |                                                                                                                                                                                                                                                                                                                                                   |                                          |           |             |       |                |                                        |                             |                                                                   |                                |                                                                                                    |
| Point in time                                                                                                                                                                      |                           |                                                                                                                                                                                                                                                                                                                                                   | Cumulative results (Sept 2019-Sept 2021) |           |             |       |                |                                        |                             |                                                                   |                                |                                                                                                    |
| Indicator                                                                                                                                                                          | Q1 median proportion 2020 | Q1 median proportion 2021                                                                                                                                                                                                                                                                                                                         | Q1 2021 - Q1 2020                        | Numerator | Denominator | %     | Numerator (%)  | Number of hazardous prescribing events | Ratio of events to patients | Number of practices with at least one hazardous prescribing event | % of total number of practices | Number of practices with at least one hazardous prescribing event (% of total number of practices) |
| <b>Indicators associated with gastroi</b>                                                                                                                                          | -                         | -                                                                                                                                                                                                                                                                                                                                                 | -                                        | 315932    | 6137856     | 5.15  | 315932 (5.15%) | -                                      | -                           | 3797                                                              | -                              | -                                                                                                  |
| <b>Lithium and no level recording:</b> patients receiving lithium for at least 3 months who have not had a recorded check of their lithium concentrations in the previous 3 months | 34.28                     | 42.32                                                                                                                                                                                                                                                                                                                                             | 8.04                                     | 22546     | 24830       | 90.8  | 22546 (90.8%)  | 167281                                 | 7.42                        | 3490                                                              | 91.34                          | 3490 (91.34%)                                                                                      |
| <b>Amiodarone and no TFT:</b> patients receiving amiodarone for at least 6 months who have not had a thyroid function test (TFT) within the previous 6 months                      | 34.63                     | 38.49                                                                                                                                                                                                                                                                                                                                             | 3.86                                     | 27249     | 35401       | 76.97 | 27249 (76.97%) | 165510                                 | 6.07                        | 3587                                                              | 93.88                          | 3587 (93.88%)                                                                                      |
